# Supplementary material for: Cryo-electron microscopy structures of the SARS-CoV spike glycoprotein reveal a prerequisite conformational state for receptor binding
Source: Springer Nature journal article supplement (doi:10.1038/cr.2016.152), 2016-12-23
Supplement: 41422_2017_BFcr2016152_MOESM26_ESM.pdf [file 41422_2017_BFcr2016152_MOESM26_ESM.pdf]

## Supplementary information, Figure S2

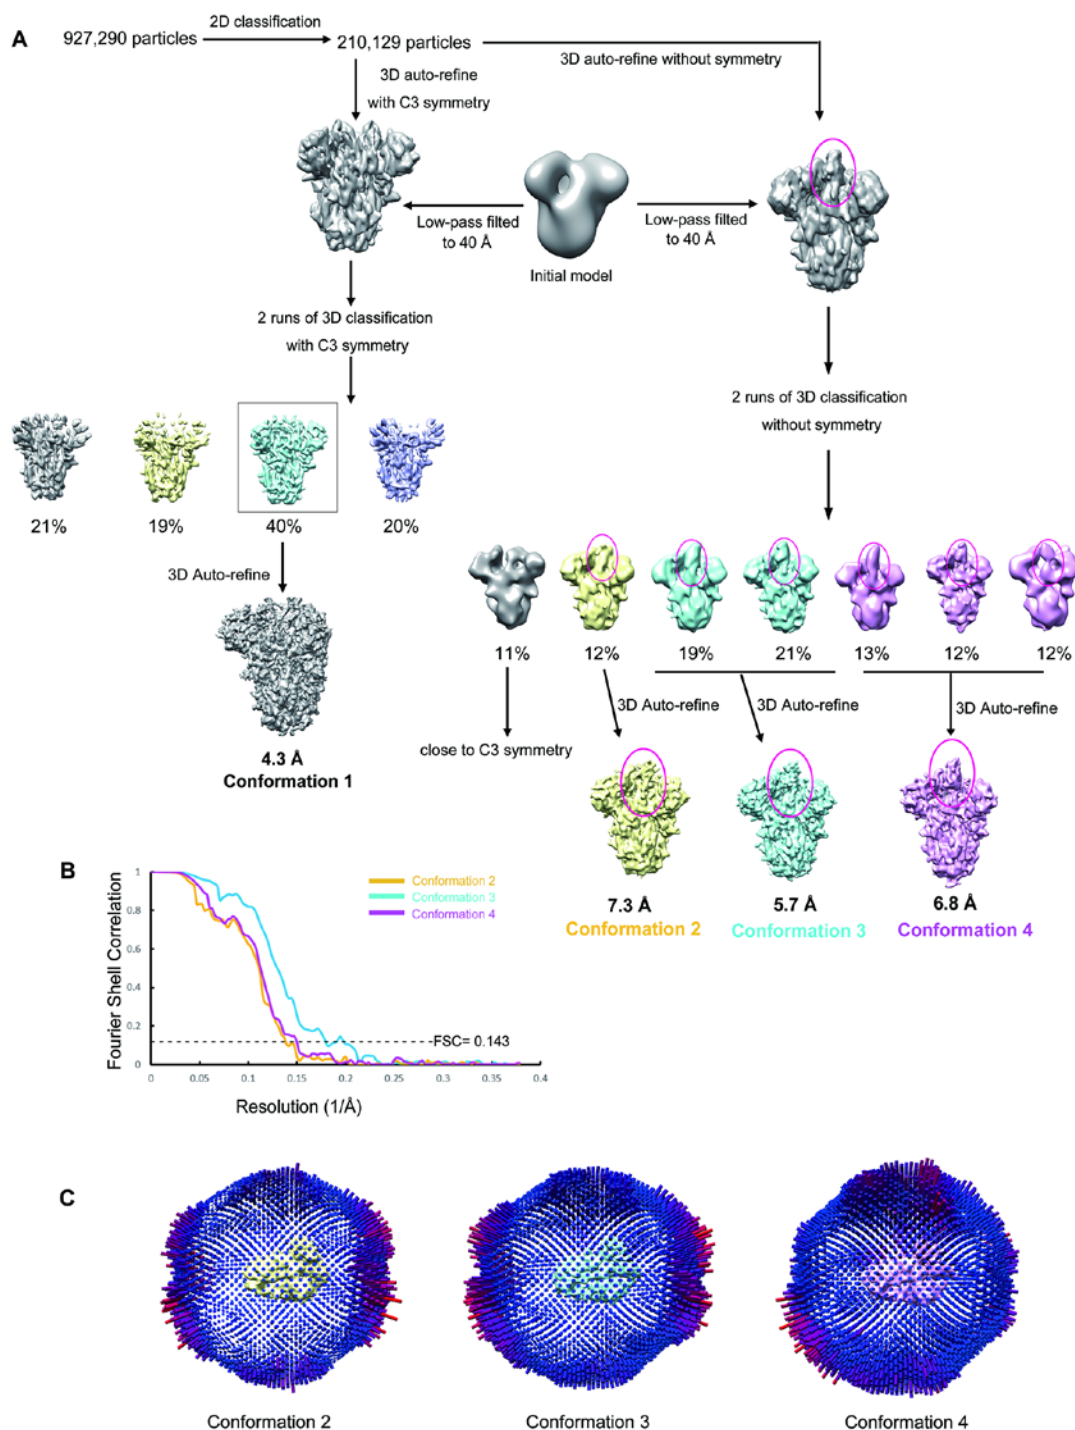

**Figure S2 3D reconstruction flowchart.** (A) Scheme for the 3D classification and reconstruction (see Materials and Methods for details). (B) Fourier shell correlation

(FSC) curves of the final 3D half maps of the asymmetric conformations 2-4. The resolutions calculated were 7.3 Å (conformation 2, yellow curve), 5.7 Å (conformation 3, cyan curve) and 6.8 Å (conformation 4, pink curve). (C) Particle orientation distributions of the asymmetric conformations 2-4 shown around the corresponding EM maps.
