# Supplementary material for: Cryo-electron microscopy structures of the SARS-CoV spike glycoprotein reveal a prerequisite conformational state for receptor binding
Source: Springer Nature journal article supplement (doi:10.1038/cr.2016.152), 2016-12-23
Supplement: 41422_2017_BFcr2016152_MOESM27_ESM.pdf [file 41422_2017_BFcr2016152_MOESM27_ESM.pdf]

## Supplementary information, Figure S3

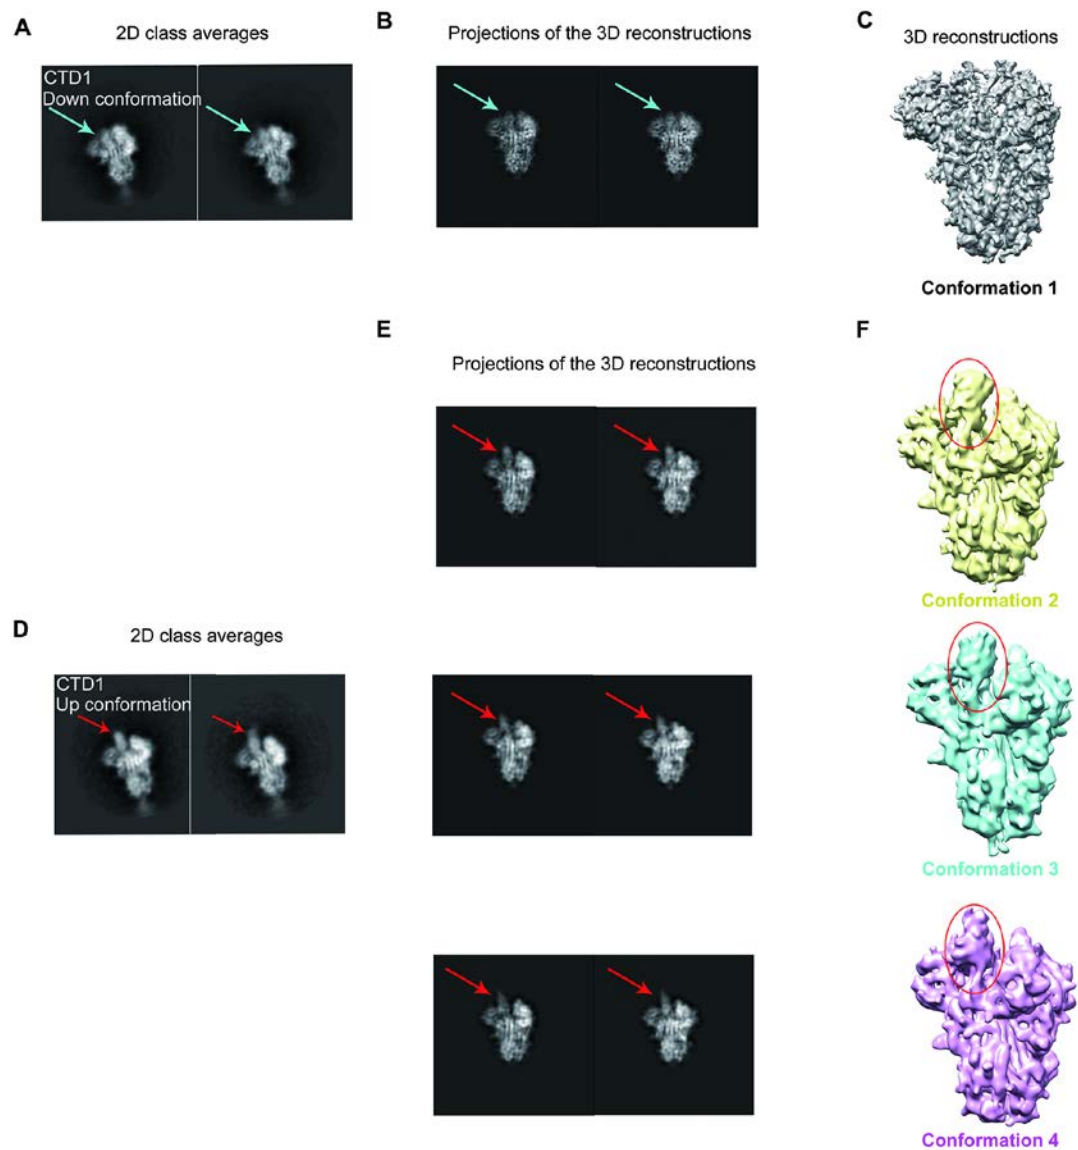

**Figure S3 Comparisons of the 2D class averaged images and 2D projections of the 3D reconstructions.** (A) Representative 2D class averaged images with all CTD1s in the “down” conformation. Locations of the CTD1s are indicated by cyan arrows. (B) Representative 2D projections with all CTD1s in the “down” conformation. (C) Corresponding 3D density map with all CTD1s in the “down”

conformation. (D) Representative 2D class averaged images of the CTD1-“up” conformations 2-4. (E) Representative 2D projections of the CTD1-“up” conformations 2-4. (F) Corresponding 3D density maps of the CTD1-“up” conformations. Locations of the “up” CTD1s are indicated by red arrows in the 2D averaged or projection images and by red ellipses in the 3D density maps.
