# Supplementary material for: Cryo-electron microscopy structures of the SARS-CoV spike glycoprotein reveal a prerequisite conformational state for receptor binding
Source: Springer Nature journal article supplement (doi:10.1038/cr.2016.152), 2016-12-23
Supplement: 41422_2017_BFcr2016152_MOESM28_ESM.pdf [file 41422_2017_BFcr2016152_MOESM28_ESM.pdf]

## Supplementary information, Figure S4

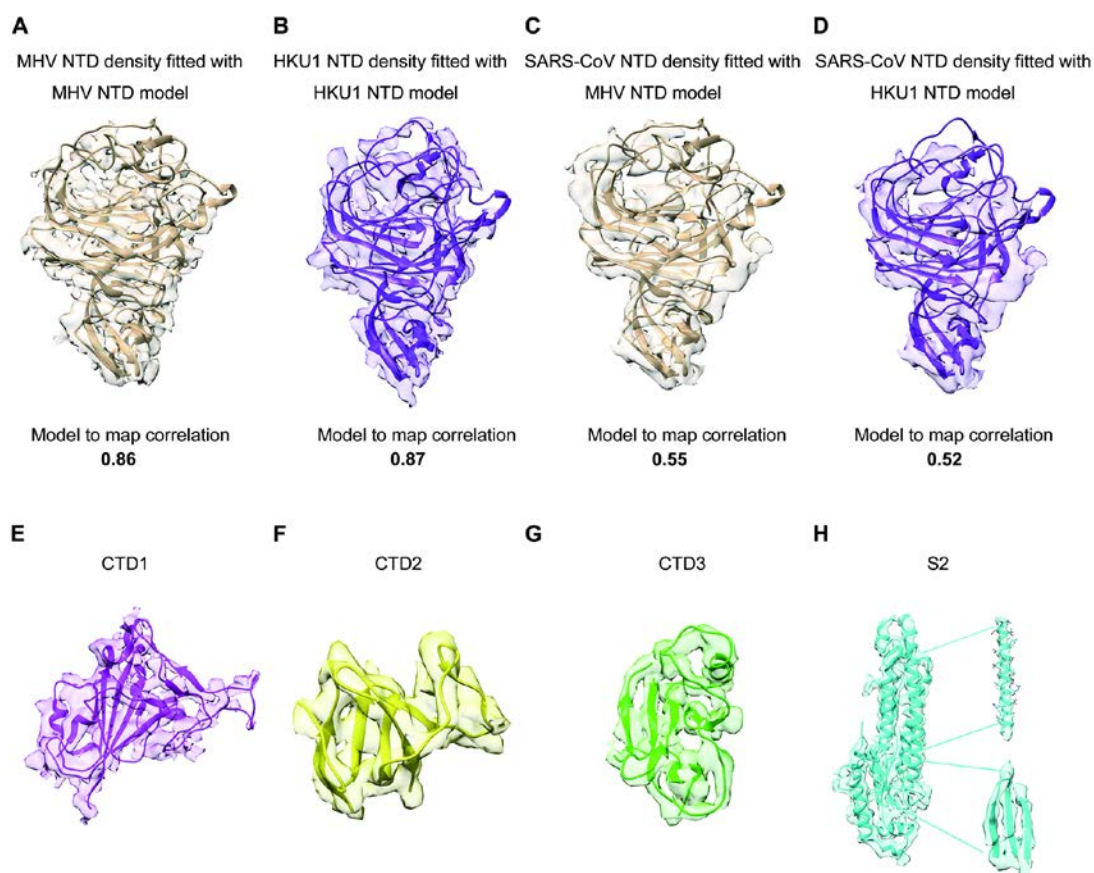

**Figure S4 Domain densities of the symmetric SARS-CoV S and comparisons of the SARS-CoV S NTD density with these of MHV S and HKU1 S.** (A-B) Densities of the MHV S NTD (EMDB accession number 6526) (A) and HKU1 S NTD (EMDB accession number 8069) (B) fitted with the corresponding NTD model. (C-D) Densities of the SARS-CoV S NTD domain fitted with the NTD model of MHV (PDB accession number 3JCL) (C) or HKU1 (PDB accession number 5I08) (D). The model to density map correlations was shown below the maps and models. (E-H) The EM densities of CTD1 (E), CTD2 (F), CTD3 (G) and S2 (H) domains fitted with the final corresponding domain models. The representative  $\alpha$ -helix and  $\beta$ -strands of the S2 domain were zoomed in (H).
