# Supplementary material for: Cryo-electron microscopy structures of the SARS-CoV spike glycoprotein reveal a prerequisite conformational state for receptor binding
Source: Springer Nature journal article supplement (doi:10.1038/cr.2016.152), 2016-12-23
Supplement: 41422_2017_BFcr2016152_MOESM30_ESM.pdf [file 41422_2017_BFcr2016152_MOESM30_ESM.pdf]

## Supplementary information, Figure S6

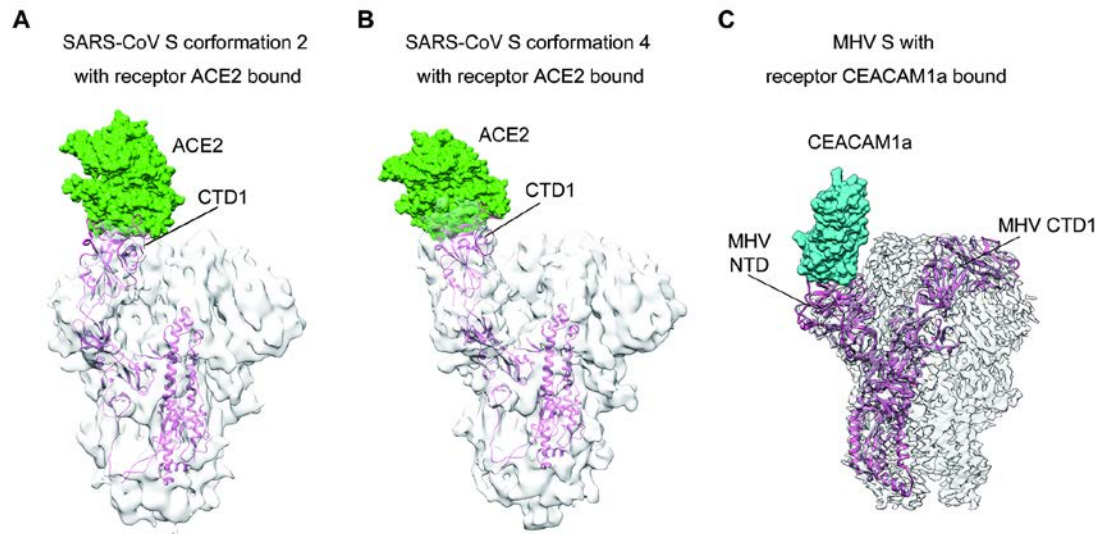

**Figure S6 Structural superimpositions showing the “binding” of the receptors to the corresponding S trimers.** (A) Structural superimpositions of the CTD1-ACE2 complex (PDB: 2AJF) onto the “up” CTD1 of the SARS-CoV S trimer in conformation 2, showing the “binding” of ACE2 to the SARS-CoV S trimer. (B) Structural superimpositions of the CTD1-ACE2 complex onto the “up” CTD1 of the SARS-CoV S trimer in conformation 4, showing the “binding” of ACE2 to the SARS-CoV S trimer. (C) Structural superimpositions of the NTD-CEACAM1 complex onto one NTD of the MHV S trimer, showing the “binding” of CEACAM1 to the MHV S trimer.
