# Supplementary material for: Cryo-electron microscopy structures of the SARS-CoV spike glycoprotein reveal a prerequisite conformational state for receptor binding
Source: Springer Nature journal article supplement (doi:10.1038/cr.2016.152), 2016-12-23
Supplement: 41422_2017_BFcr2016152_MOESM31_ESM.pdf [file 41422_2017_BFcr2016152_MOESM31_ESM.pdf]

## Supplementary information, Figure S7

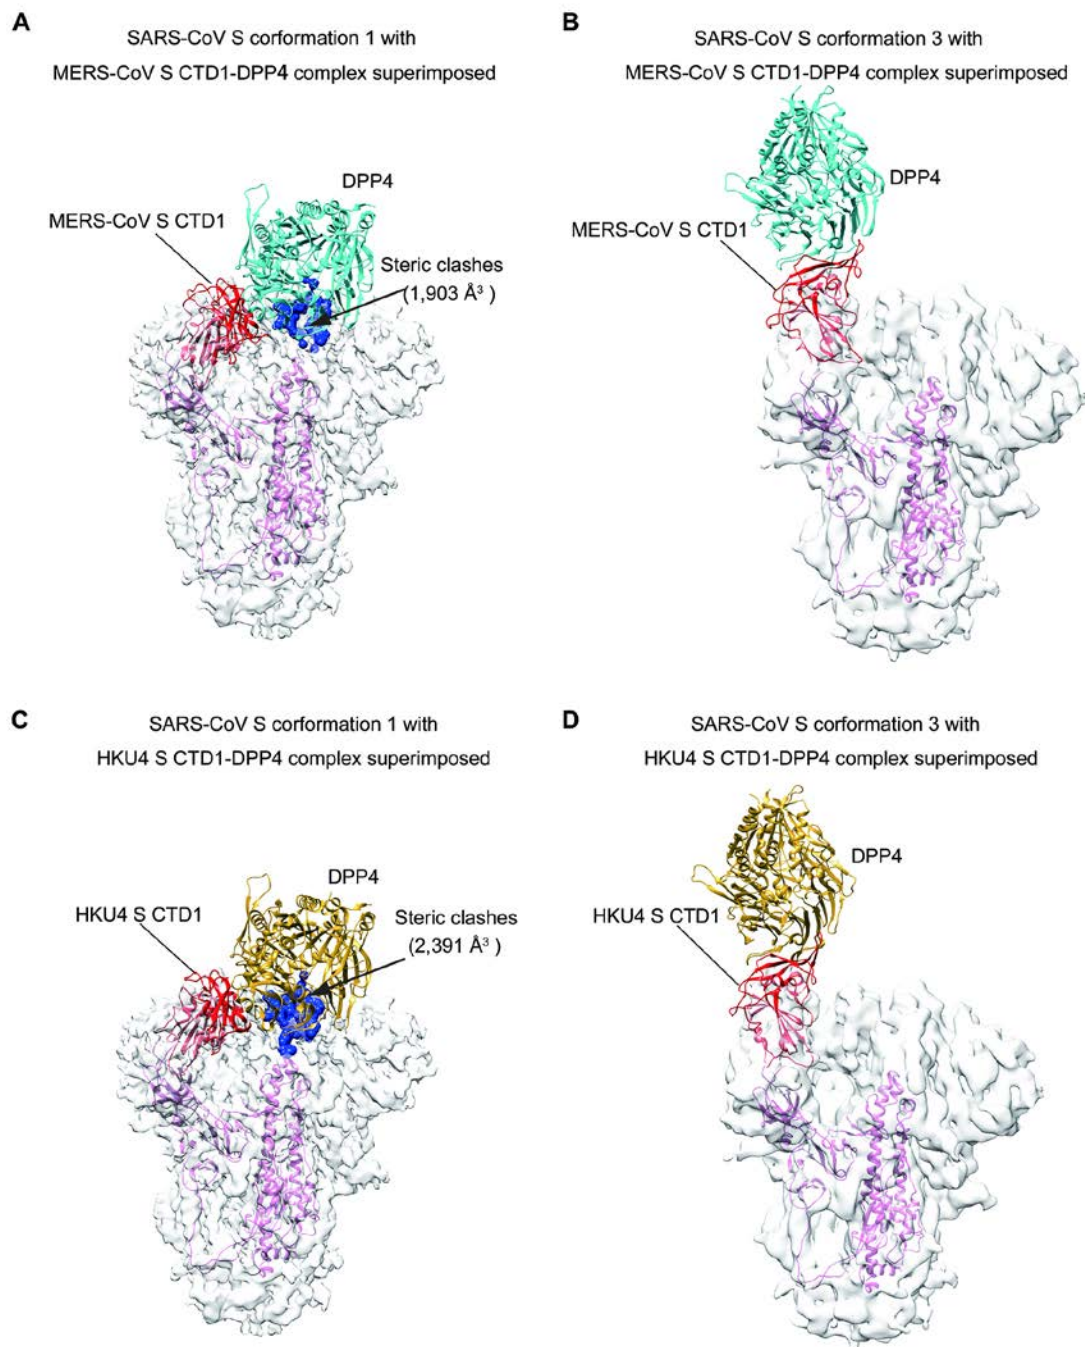

**Figure S7 Structural modeling showing the “binding” of the MERS-CoV and HKU4 receptor to the S trimers. (A) Fitting of the MERS-CoV CTD1-DPP4 complex crystal structure into in the “down” conformation CTD1 of the SARS-CoV S density map resulted in steric clashes between the “bound” DPP4 and the S trimer. (B)**

Fitting of the MERS-CoV CTD1-DPP4 complex crystal structure into the “up” conformation CTD1 of the SARS-CoV S EM map showing no steric clashes. (C-D), Similar fitting of the HKU4 CTD1-DPP4 complex crystal structure showing steric clashes for the binding to the “down” conformation CTD1 and no steric clashes for the binding to the “up” conformation CTD1. The steric clashes are highlighted in blue.
