# Supplementary material for: Cryo-electron microscopy structures of the SARS-CoV spike glycoprotein reveal a prerequisite conformational state for receptor binding
Source: Springer Nature journal article supplement (doi:10.1038/cr.2016.152), 2016-12-23
Supplement: 41422_2017_BFcr2016152_MOESM32_ESM.pdf [file 41422_2017_BFcr2016152_MOESM32_ESM.pdf]

**Supplementary information, Table S1**  
**Cryo-EM data collection and image processing statistics**

(A) Statistics of SARS-CoV S structure determination with C3 symmetry

| Data collection                               |             |
|-----------------------------------------------|-------------|
| Electron microscope                           | Titan Krios |
| Voltage (kV)                                  | 300         |
| Electron detector                             | K2          |
| Pixel size (Å)                                | 1.32        |
| Defocus range (µm)                            | 1.0 – 3.8   |
| Frames per movie                              | 32          |
| Dose rate (e <sup>-</sup> /Å <sup>2</sup> ·s) | 4.7         |
| 3D Reconstruction                             |             |
| CTF estimation                                | CTFFIND4    |
| Software                                      | RELION 1.4  |
| Particles for final refinement                | 34,152      |
| Map sharpening B-factors (Å <sup>2</sup> )    | -140        |
| Final Resolution (Å)                          | 4.3         |
| Model Refinement                              |             |
| Software                                      | PHENIX      |
| Fourier Shell Correlation                     | 0.71        |
| Molprobit score                               | 2.20        |
| Rotamer outliers (%)                          | 0.71        |
| C-beta deviations                             | 0           |
| Clashscore                                    | 8.66        |
| R.m.s. deviations                             |             |
| Bonds length (Å)                              | 0.0077      |
| Bonds angles (°)                              | 1.61        |
| Ramachandran plot (%)                         |             |
| Favored                                       | 80.26       |
| Outliers                                      | 0.41        |

(B) Statistics of 3D reconstructions of SARS-CoV S of different conformations

|                         | SARS-CoV S<br>Conformation 1<br>(C3 symmetry) | SARS-CoV S<br>Conformation 2<br>(C1 symmetry) | SARS-CoV S<br>Conformation 3<br>(C1 symmetry) | SARS-CoV S<br>Conformation 4<br>(C1 symmetry) |
|-------------------------|-----------------------------------------------|-----------------------------------------------|-----------------------------------------------|-----------------------------------------------|
| Particles               | 34,152                                        | 11,554                                        | 39,350                                        | 38,804                                        |
| Final Resolution (Å)    | 4.3                                           | 7.3                                           | 5.7                                           | 6.8                                           |
| Angle of CTD1 (°)       | 19                                            | 52                                            | 64                                            | 70                                            |
| PHENIX CC*              |                                               | 0.951                                         | 0.925                                         | 0.937                                         |
| Chimera CC <sup>#</sup> |                                               | 0.968                                         | 0.949                                         | 0.959                                         |

The asymmetric CTD1 domain is masked out and the cross correlation is calculated between the masked maps of conformation 2-4 and conformation 1.

\*Cross correlation calculated using *Phenix.get\_cc\_mtz\_mtz* command.

# Cross correlation calculated using Chimera *measure correlation* command.
